# Supplementary material for: Synthesis of an Aryl-Semicarbazone-Based Cu(II) Complex for DNA and BSA Interaction and Anti-Cancer Activity against Human Cervix Uteri Carcinoma
Source: MDPI journal article supplement (doi:10.3390/inorganics12010019), 2024-01-01
Supplement: s1 [file s1]

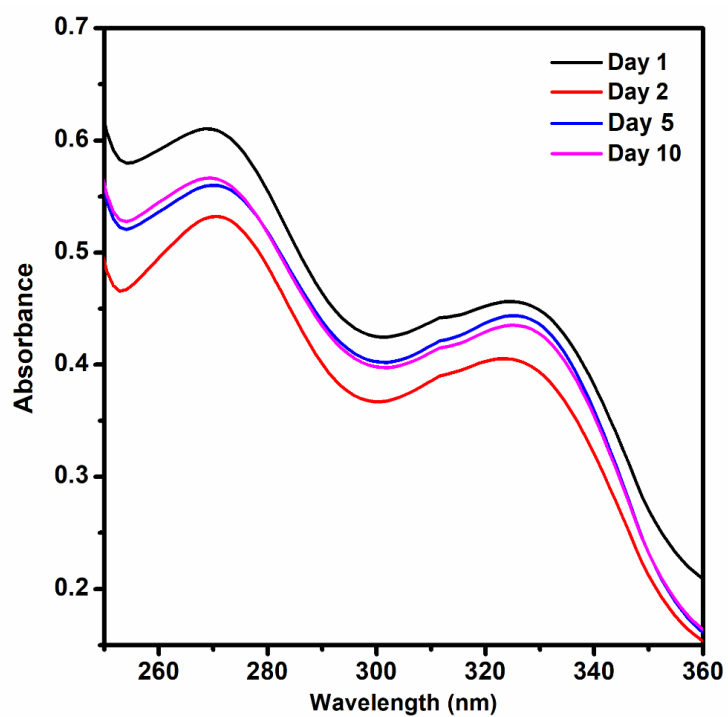

Figure S1 Electronic absorption spectra of the complex in HEPES buffer for different times (Day 1, Day 2, Day 5 and Day 10)

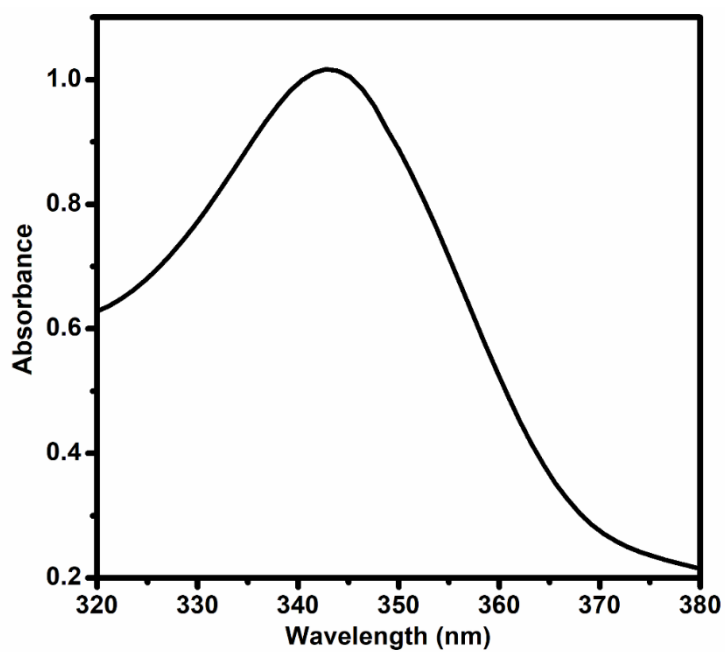

Figure S2 Electronic absorption spectrum of the ligand

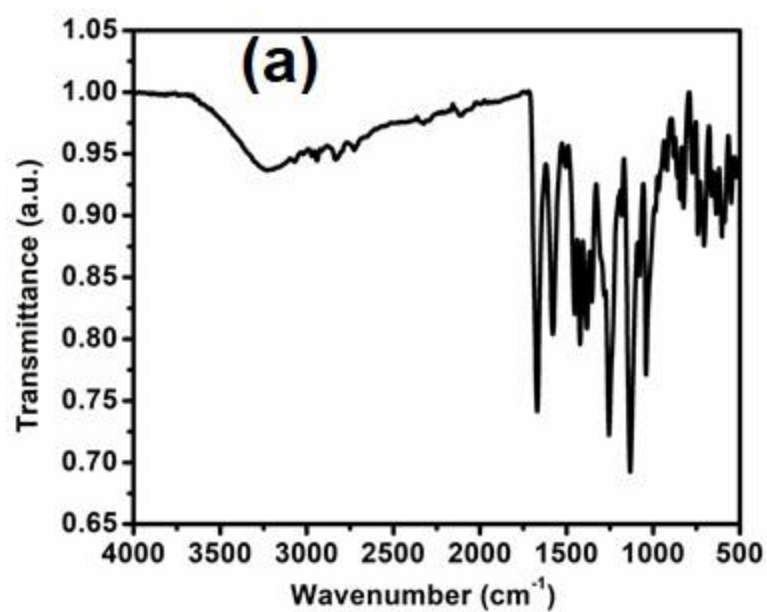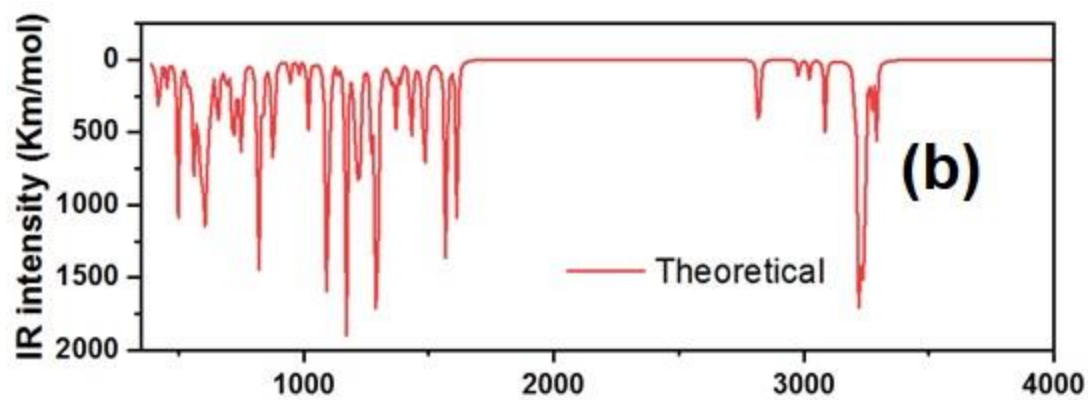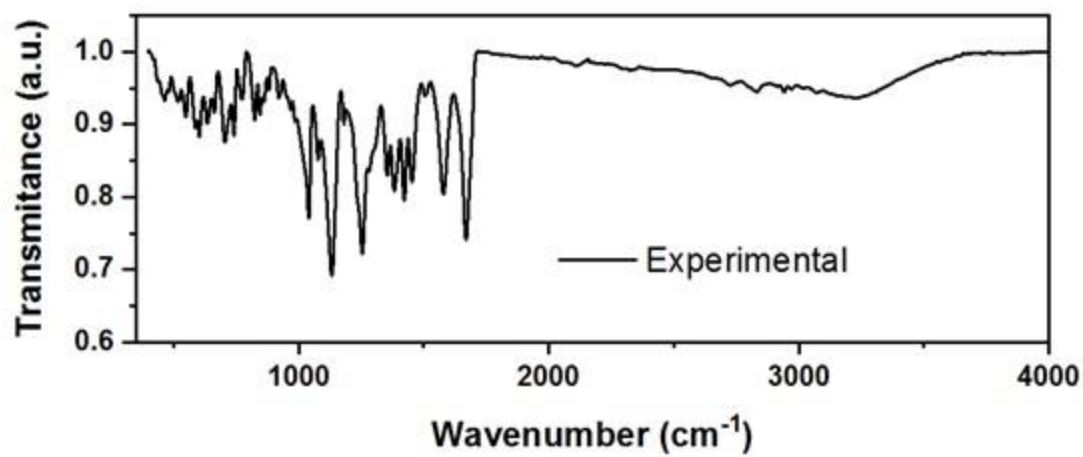

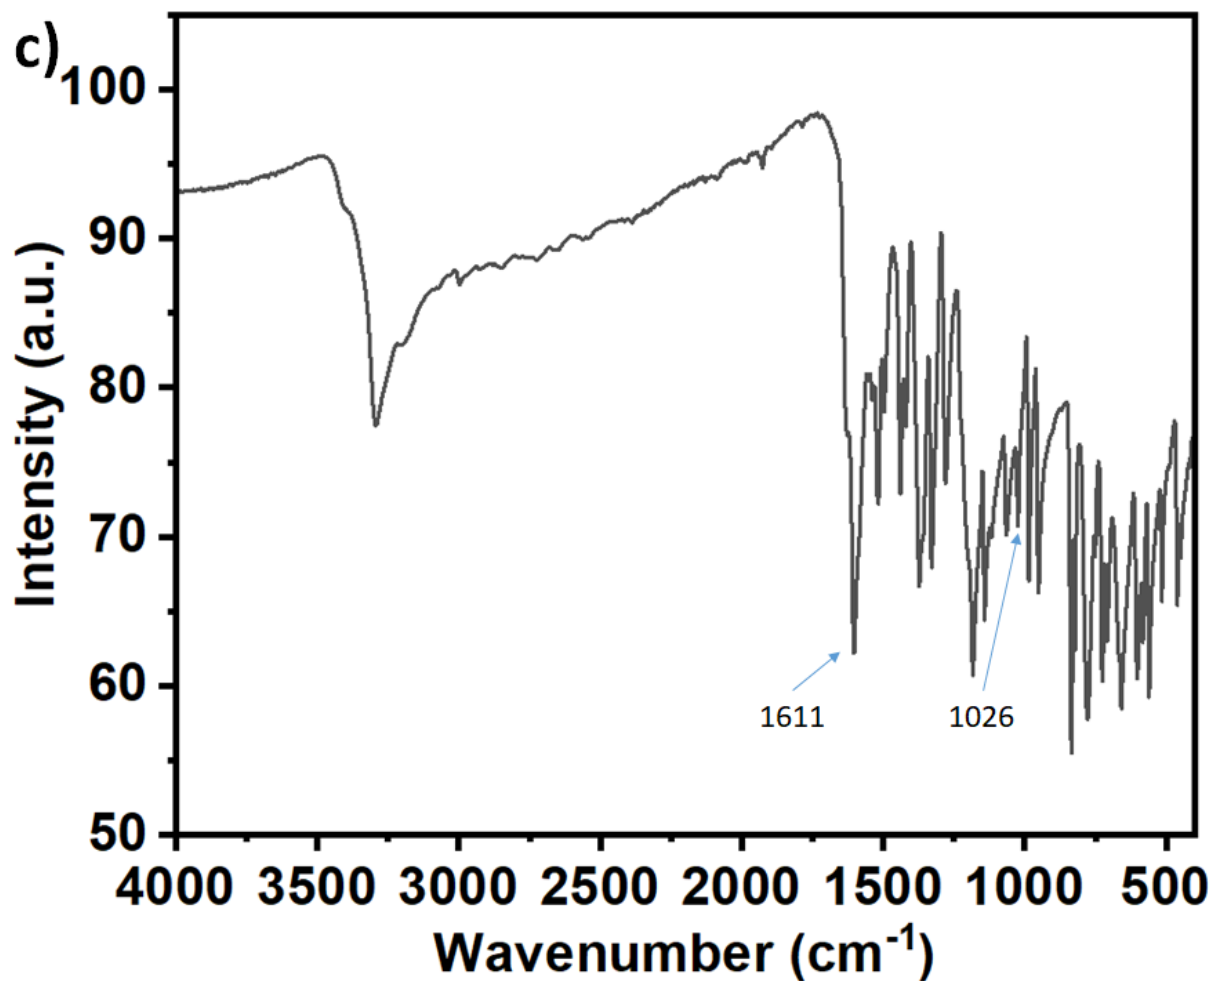

Figure S3 (a) FTIR spectrum of the complex (b) The experimental and DFT-simulated IR spectroscopy of the complex (c) FTIR spectrum of the ligand

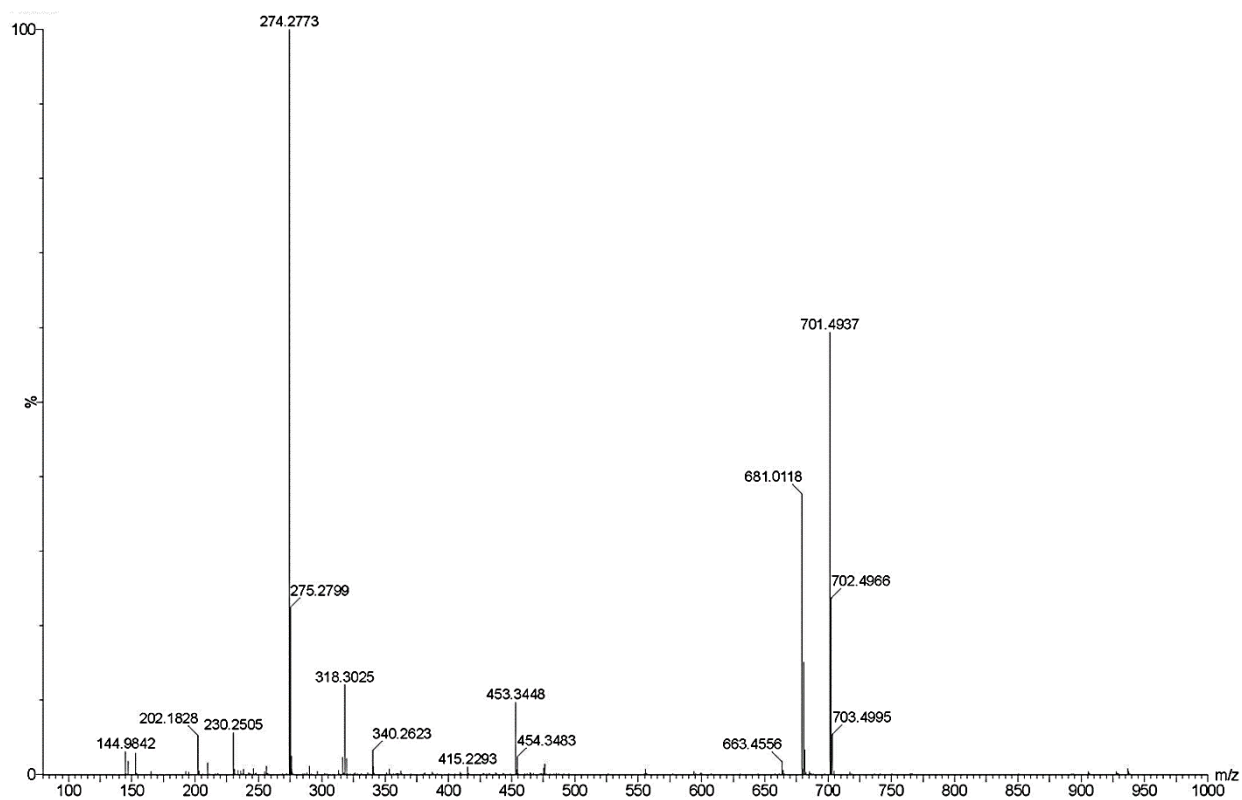

Figure S4 ESI-MS spectrum of the complex

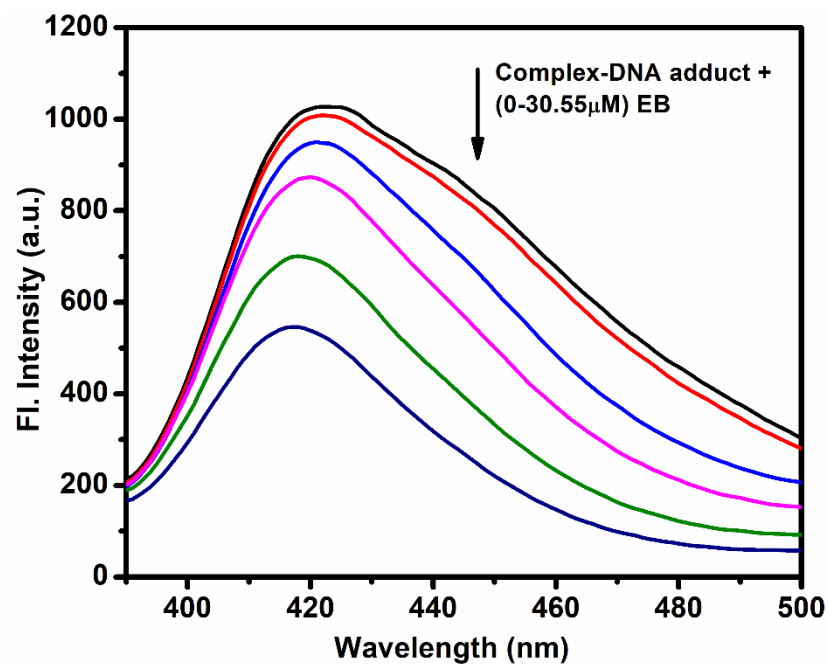

Figure S5 Fluorescence displacement assay of the complex by EB

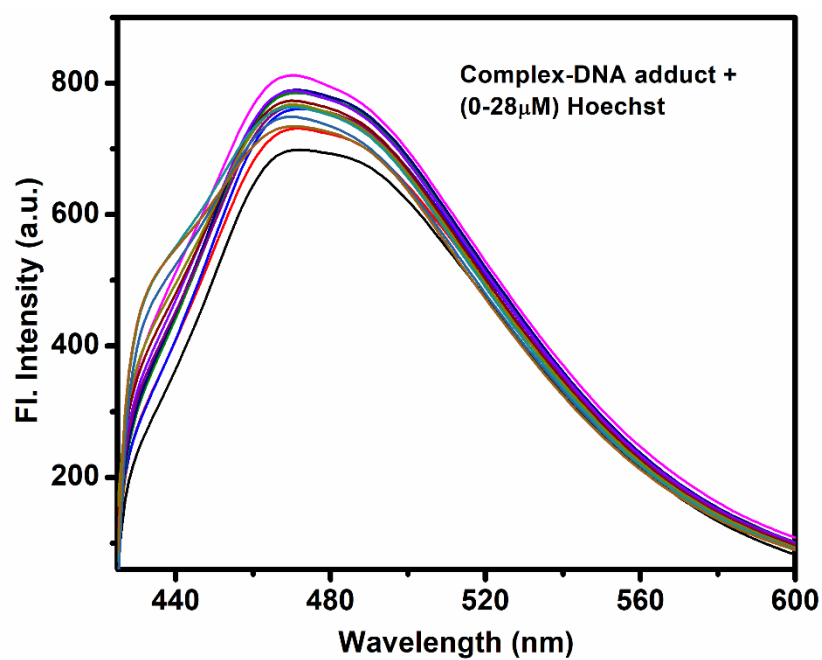

Figure S6 Fluorescence displacement assay of the complex by Hoechst

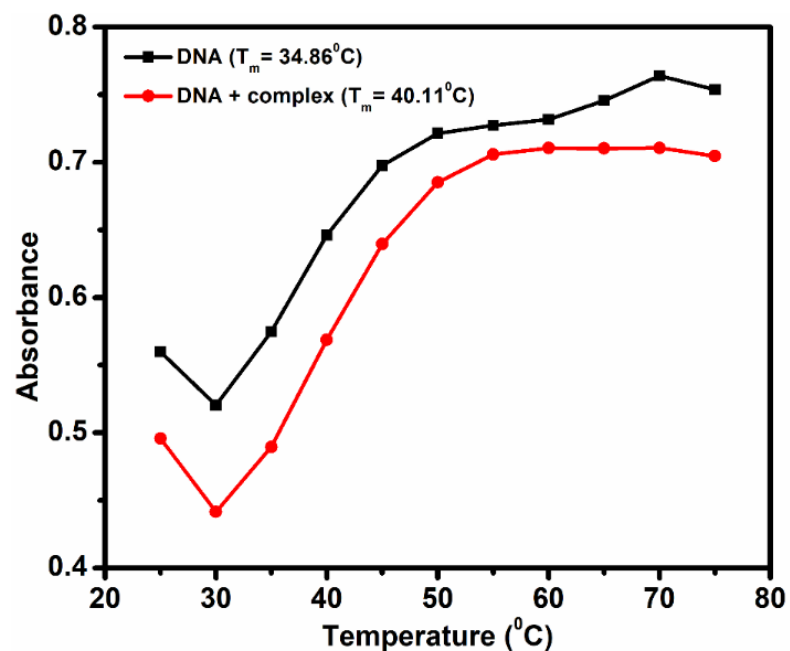

Figure S7 Melting temperature of CT-DNA with and without the complex

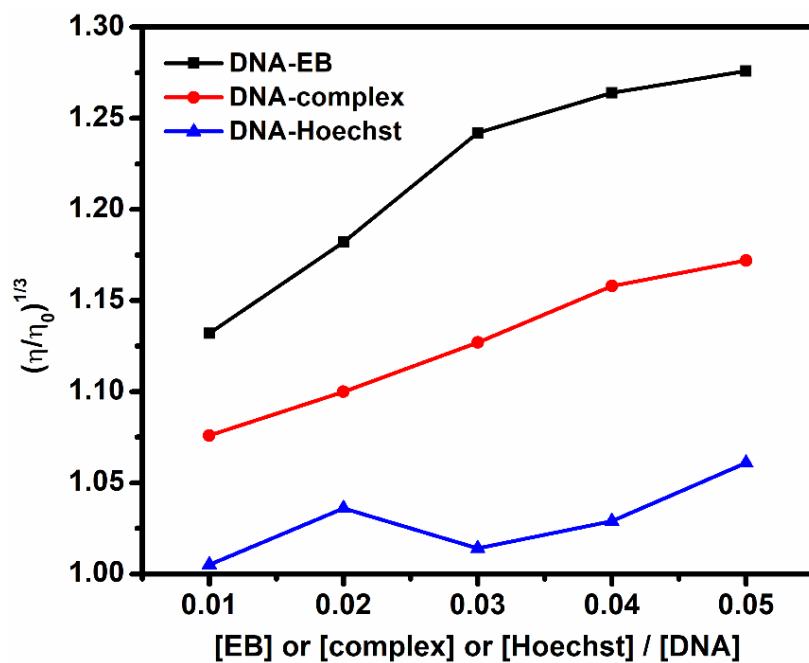

Figure S8 Relative viscosities of the CT-DNA-EB, CT-DNA-Hoechst and CT-DNA-complex solutions with increasing amounts of EB or complex or Hoechst (0.01–0.05  $\mu\text{M}$ )

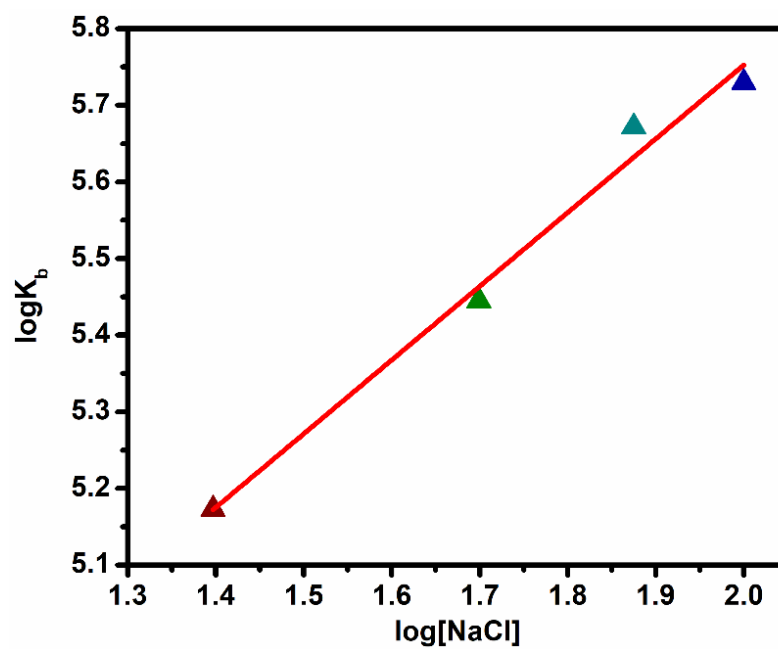

Figure S9 Plot of association constants ( $K_b$ ) of complex and CT-DNA adduct against concentration of NaCl [25-100  $\mu\text{M}$ ]

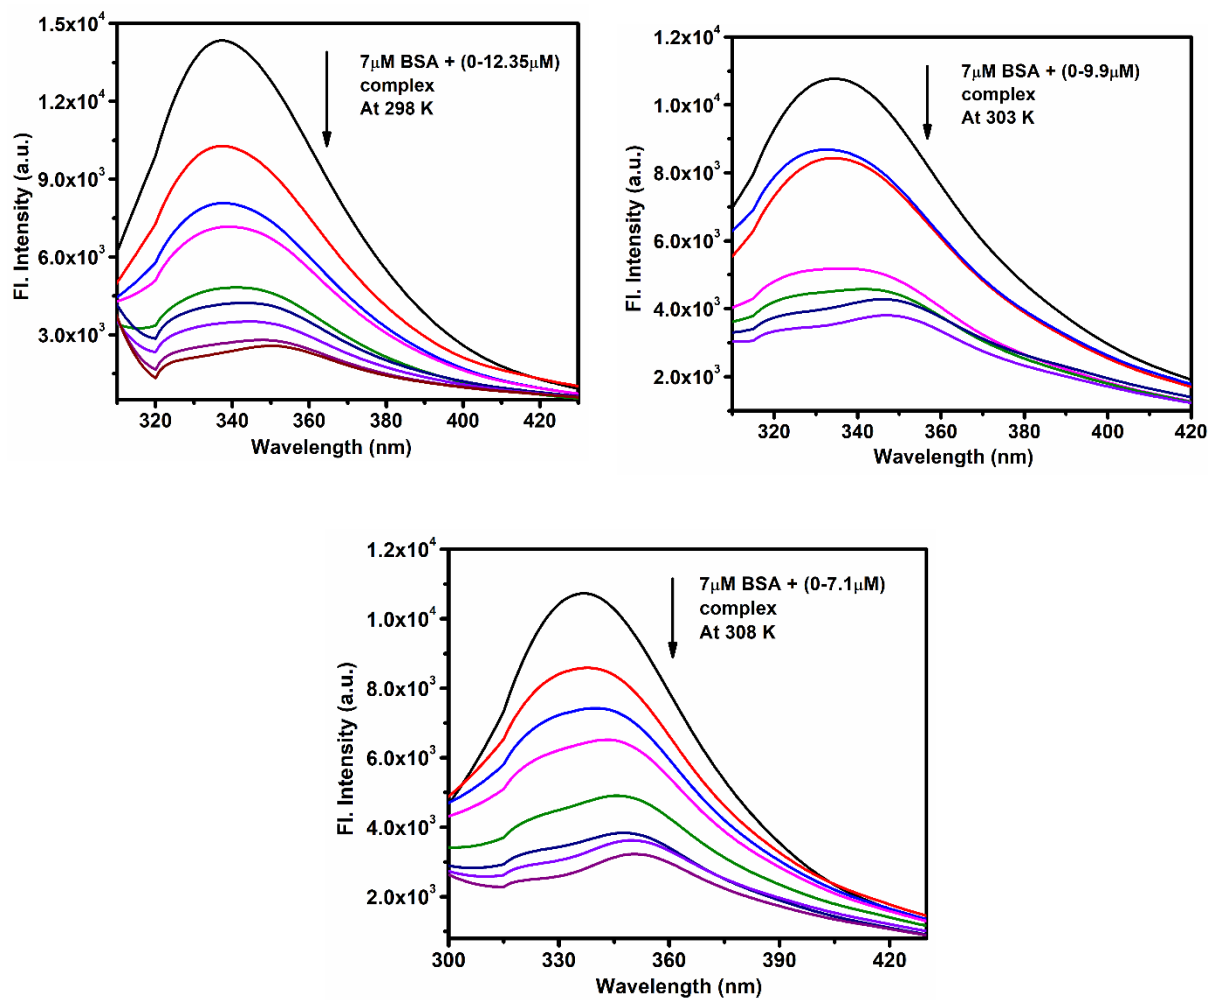

Figure S10 Effect of the addition of complex on the emission intensity of BSA at 298, 303 and 308 K



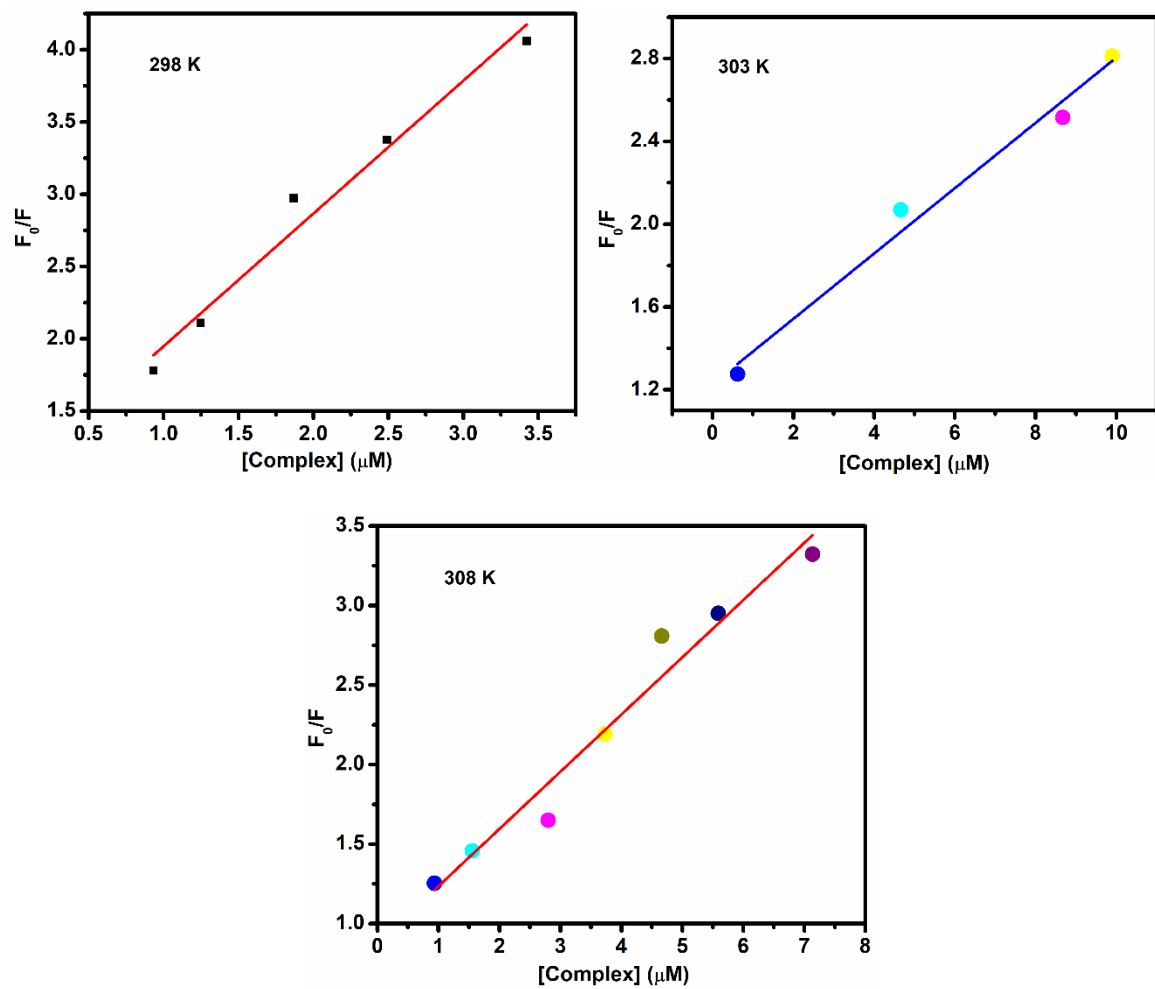

Figure S11 Stern volmer plots for fluorescence quenching of BSA at 298, 303 and 308 K

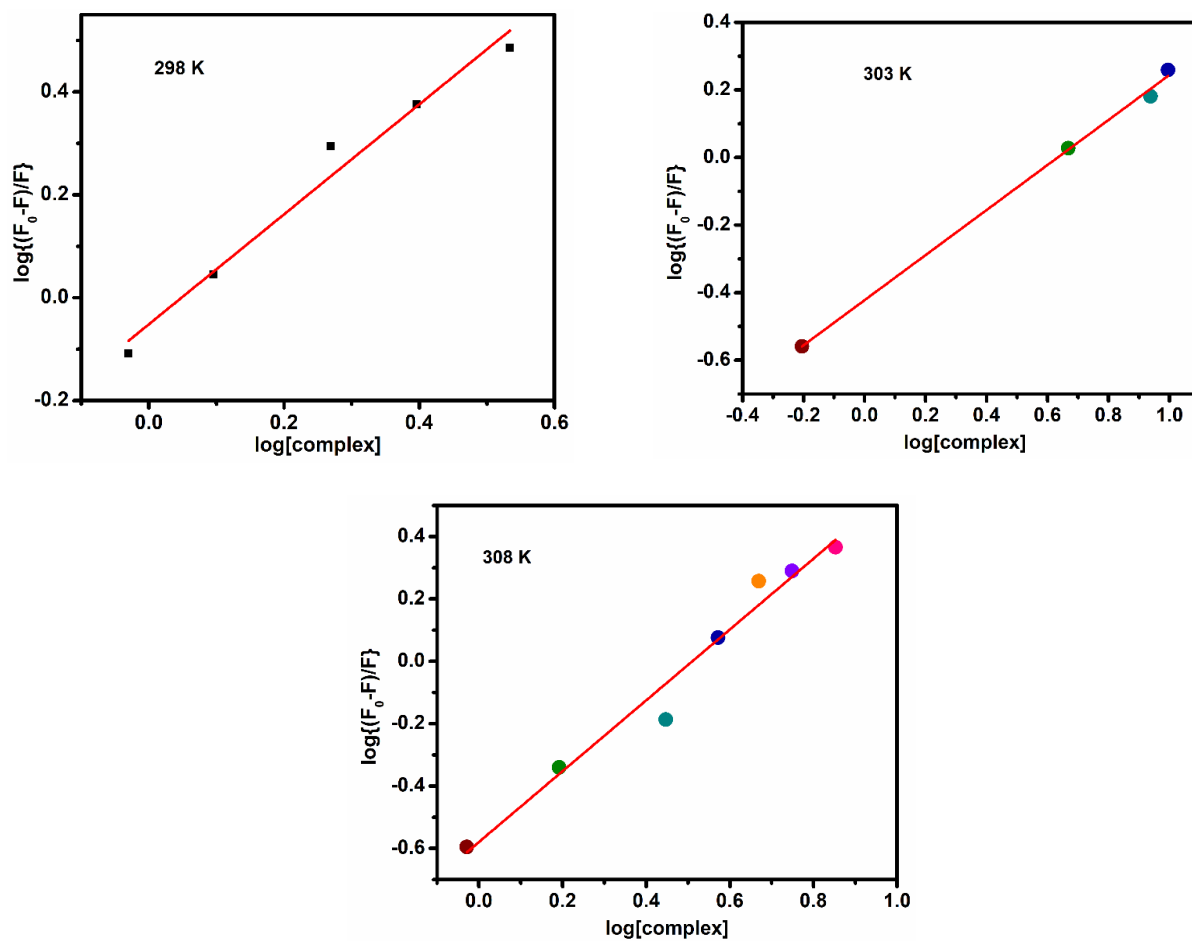

Figure S12 Plot of  $\log \{(F_0-F)/F\}$  versus  $\log [\text{complex}]$  at 298, 303 and 308 K for binding interaction of BSA with the complex

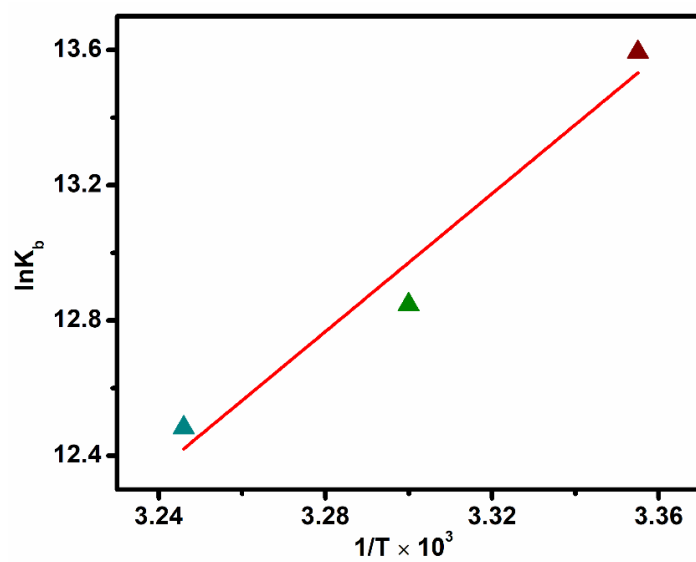

Figure S13 Plot of  $\ln K_b$  versus  $1/T$  for BSA binding with the complex

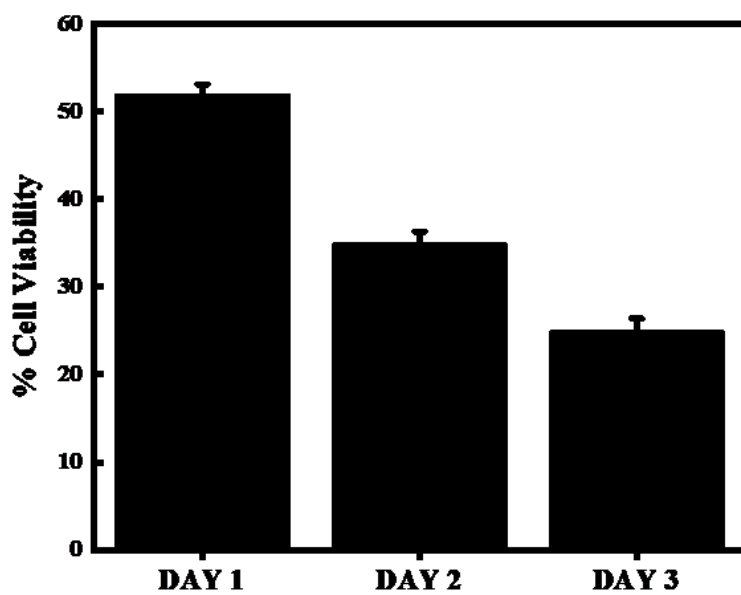

Figure S14 Day wise percentage of cell viability

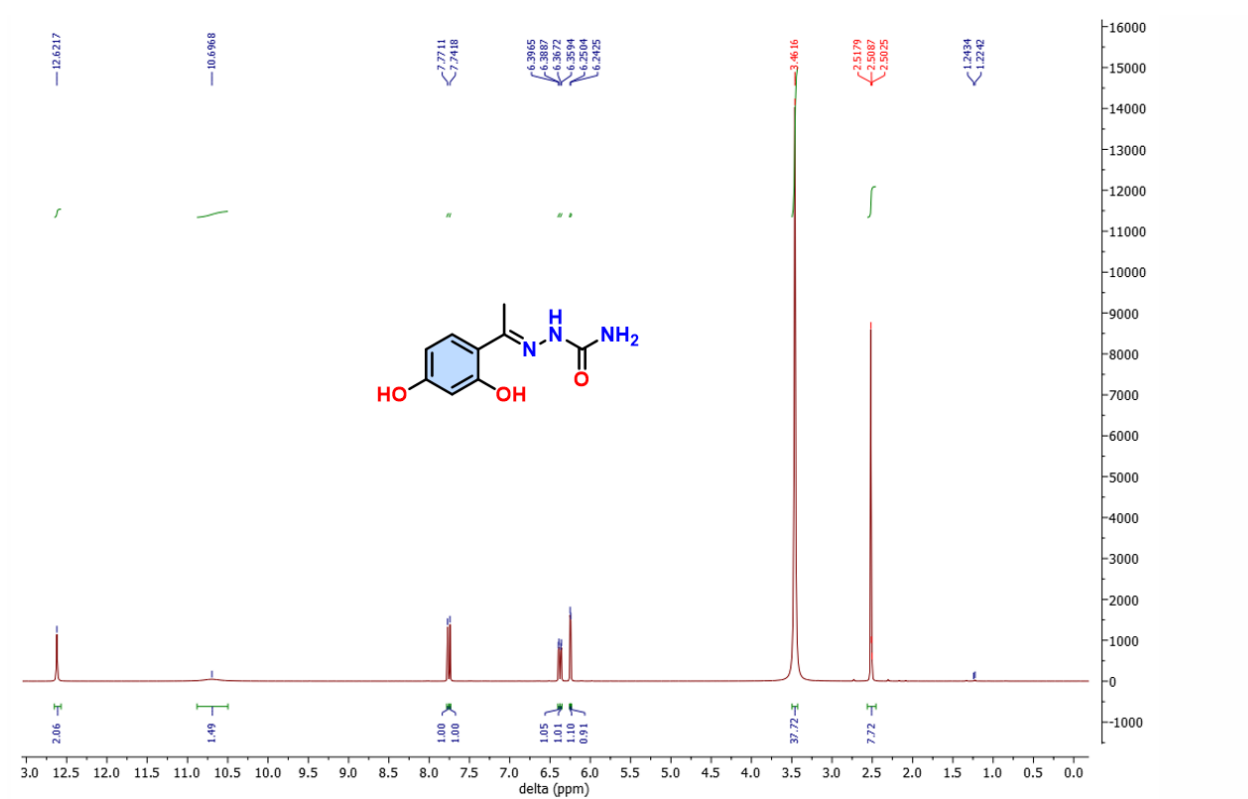

Figure S15 <sup>1</sup>H NMR of ligand

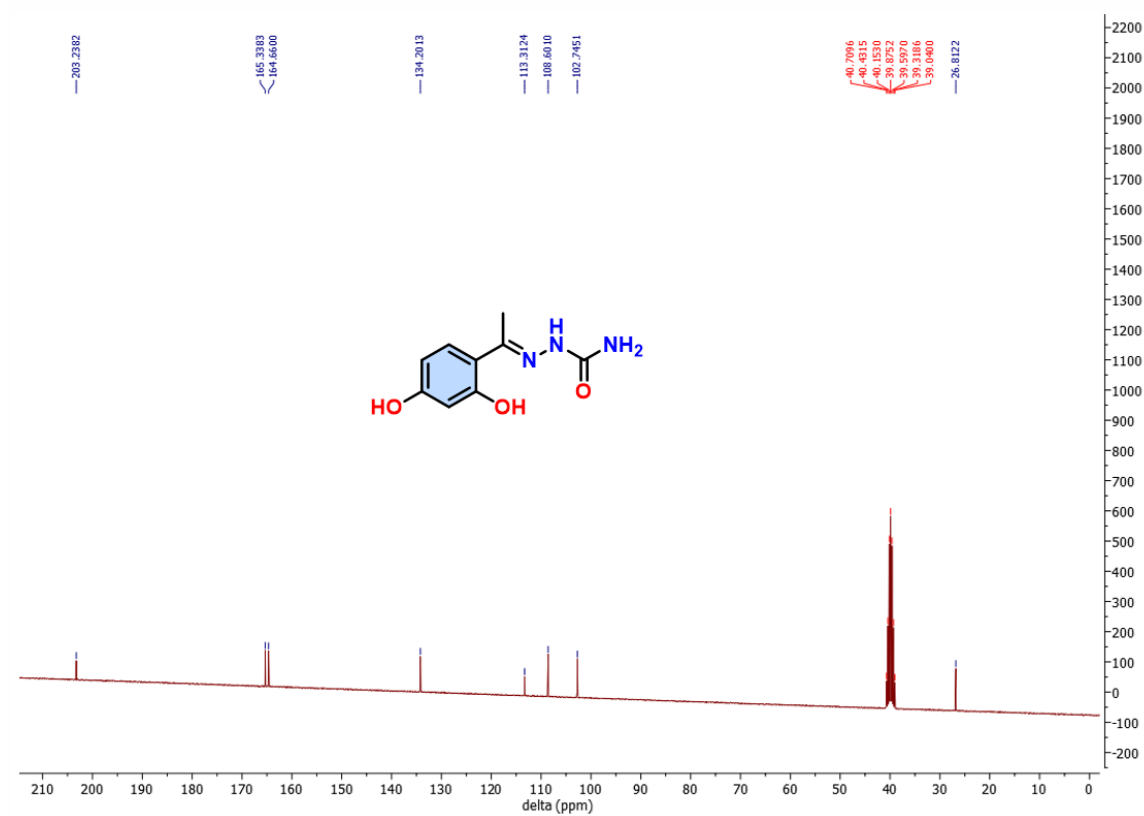

Figure S16 <sup>13</sup>C NMR of ligand

Table S1 Cu-O and Cu-N bond lengths in the complex

| Atom   | Bond length (Å <sup>0</sup> ) |
|--------|-------------------------------|
| Cu1-O1 | 1.85220                       |
| Cu2-O2 | 1.85300                       |
| Cu1-O3 | 1.83012                       |
| Cu2-O3 | 1.83067                       |
| Cu1-O4 | 1.83067                       |
| Cu2-O4 | 1.83079                       |
| Cu1-N1 | 1.88809                       |
| Cu2-N2 | 1.88862                       |
| Cu1-N3 | 1.90974                       |
| Cu2-N4 | 1.91212                       |

Table S2 Experimental and DFT-simulated IR spectroscopy data of the complex

| Major indicative bands in FTIR | Experimental value<br>(cm <sup>-1</sup> ) | DFT-simulated value<br>(cm <sup>-1</sup> ) |
|--------------------------------|-------------------------------------------|--------------------------------------------|
| $\nu(\text{C}=\text{N})$       | 1656                                      | 1611                                       |
| $\nu(\text{C}-\text{O})$       | 1220-1227                                 | 1218-1228                                  |
| $\nu(\text{Cu}-\text{O})$      | 477                                       | 470                                        |
| $\nu(\text{Cu}-\text{N})$      | 444                                       | 442                                        |
| N-H stretching                 | 3250                                      | 3226                                       |
| Aromatic C-H                   | 3144                                      | 3096                                       |
| Aliphatic C-H stretching       | 2810                                      | 2825                                       |

Table S3 Enhancement constants of DNA and complex interaction

| Temperature (K) | $K_E$ value     |
|-----------------|-----------------|
| 298             | $3 \times 10^3$ |
| 303             | $4 \times 10^3$ |
| 308             | $9 \times 10^3$ |

Table S4 Binding parameters of BSA and complex interaction

| Temperature (K) | $k_{sv}$            | $k_b$ value        | n     | $\Delta G$ (kJ mol <sup>-1</sup> ) |
|-----------------|---------------------|--------------------|-------|------------------------------------|
| 298             | $9.6 \times 10^5$   | $8.01 \times 10^5$ | 1.199 | -33.68                             |
| 303             | $1.577 \times 10^5$ | $3.8 \times 10^5$  | 0.92  | -32.36                             |
| 308             | $8.75 \times 10^5$  | $2.64 \times 10^5$ | 1.07  | -31.96                             |

### DFT Study

The predicted structure of the complex was investigated using the DFT method [1]. The functional B3LYP and basis set LanL2DZ for Cu, and 6-311G for C, H, N, and O were utilized to optimize the geometry of the molecule with the help of Gaussian 09W D1 revision [2]. The same basis set has been used for the frequency calculations. HOMO and LUMO were visualized using GaussView 5 software [3].

### Molecular Docking

The molecular docking study was conducted using Auto Dock vina software. RCSB's website (<https://www.rcsb.org/>) provided structural coordinates for CT-DNA and BSA protein (PDB ID: 1BNA and 4F5S, respectively). For the calculation, a standard protocol was used. For this example, the grid box size was  $26 \times 26 \times 26$ . We visualized the final results in Discovery studio client 2017 using the results derived from these calculations.

### References:

1. Muthukkumar, M.; Bhuvaneswari, T.; Venkatesh, G.; Kamal, C.; Vennila, P.; Armaković, S.; Armaković, S.J.; Sheena Mary, Y.; Yohannan Panicker, C. Synthesis, characterization and computational studies of semicarbazide derivative. J. Mol. Liq. 2018, 272, 481–495, doi:10.1016/j.molliq.2018.09.123.
2. 2009 Gaussian 09, Revision D.01; Gaussian, Inc.: Wallingford, CT, Gaussian 09, Revision D.01; Gaussian, Inc.: Wallingford, CT, 2009, (n.d.).
3. 2009. GaussView, Version 5; Gaussian, Inc.: Wallingford, CT, GaussView, Version 5; Gaussian, Inc.: Wallingford, CT, 2009, (n.d.).
